# Supplementary material
Source: Springer Nature journal article supplement (https://www.springermedizin.de/resource/supplementary/12974_2011_381_MOESM6_ESM.pdf/9601534)

**A**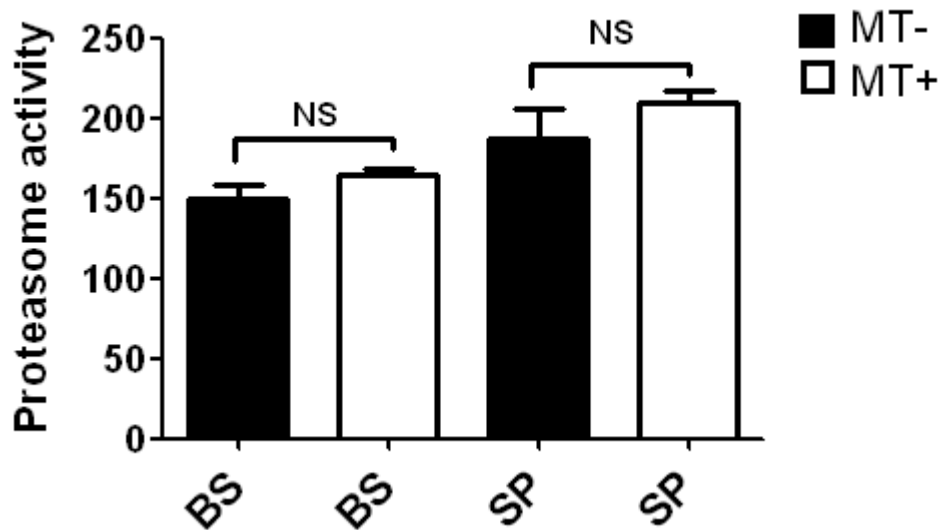**B**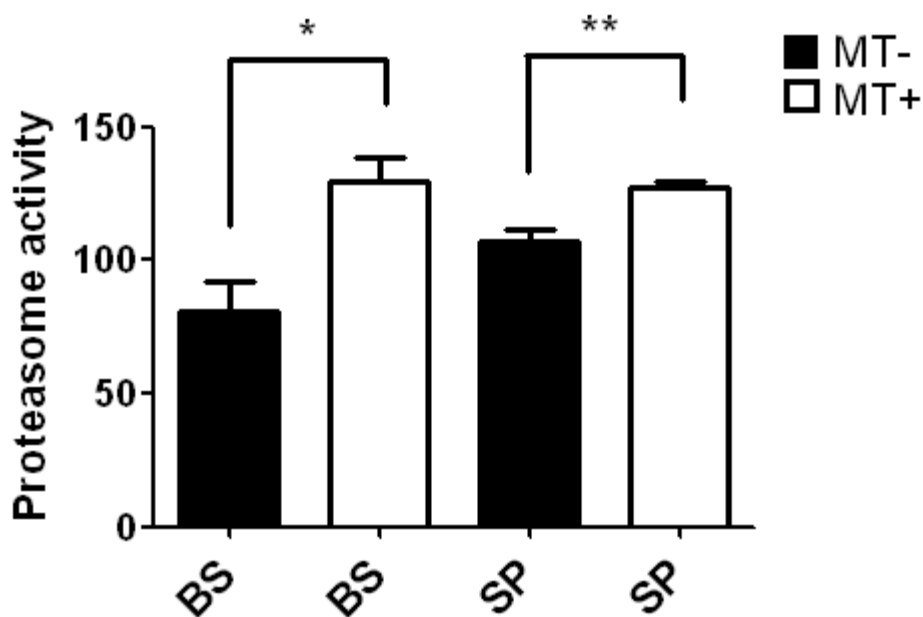

Supplement: MOESM6 [file 9601534]
